# Supplementary material for: Investigating Neuron Degeneration in Huntington’s Disease Using RNA-Seq Based Transcriptome Study
Source: MDPI journal article supplement (doi:10.3390/genes14091801), 2023-09-14
Supplement: s1 [file s1]

## Supplementary Information

### **Investigating neuron degeneration in Huntington's disease using RNA-seq based transcriptome study**

Nela Pragathi Sneha<sup>1</sup>, S. Akila Parvathy Dharshini<sup>1</sup>, Y-h. Taguchi<sup>2</sup> and  
M. Michael Gromiha<sup>1,\*</sup>

<sup>1</sup>Department of Biotechnology, Bhupat and Jyoti Mehta School of Biosciences, Indian Institute of Technology Madras, Chennai 600036, Tamilnadu, India.

<sup>2</sup>Department of Physics, Chuo University, Kasuga, Bunkyo-ku, Tokyo 112-8551, Japan.

---

\*corresponding author

Tel: +91-2257-4138

Fax: +91-2257-4102

E-mail: gromiha@iitm.ac.in

**Supplementary Table S1:** Dataset used for meta data analysis

| Samples    | Count | Age   | Post-Mortem Interval (Hours) |
|------------|-------|-------|------------------------------|
| Controls   | 7     | 42-64 | 6-24                         |
| HD_samples | 7     | 44-69 | 0-22                         |

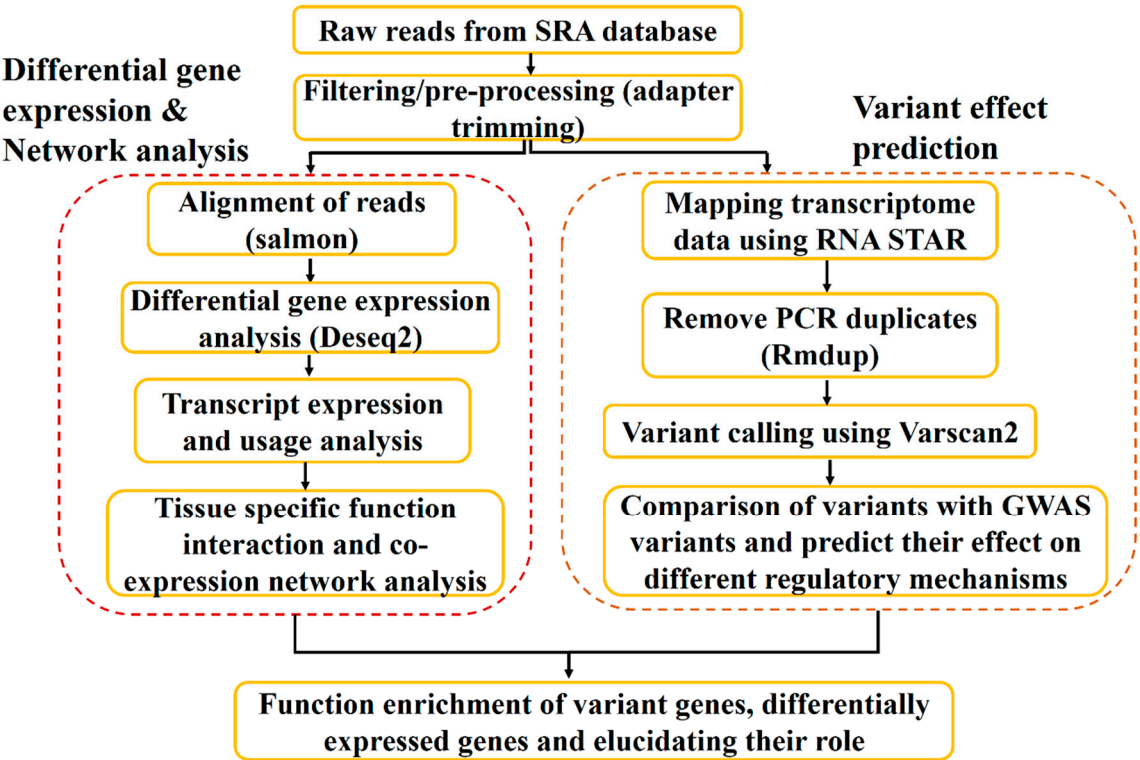

**Supplementary Figure S1:** Workflow for identifying the variants and differentially expressed genes/transcripts

**Supplementary Table S2:** Genes identified using DTE/ DTU analysis

| Gene ID         | Gene Name       | Gene q-value | Number of transcripts | Number of significant transcripts |
|-----------------|-----------------|--------------|-----------------------|-----------------------------------|
| ENSG00000175287 | <i>PHYHDI</i>   | 0.014434     | 10                    | 1                                 |
| ENSG00000120833 | <i>SOCS2</i>    | 0.03452      | 8                     | 1                                 |
| ENSG00000100722 | <i>ZC3H14</i>   | 0.020912     | 8                     | 1                                 |
| ENSG00000100519 | <i>PSMC6</i>    | 1.11E-10     | 7                     | 1                                 |
| ENSG00000088836 | <i>SLC4A11</i>  | 0.007169     | 7                     | 1                                 |
| ENSG00000167196 | <i>FBXO22</i>   | 9.54E-06     | 7                     | 1                                 |
| ENSG00000144857 | <i>BOC</i>      | 0.002836     | 7                     | 1                                 |
| ENSG00000169220 | <i>RGS14</i>    | 0.020116     | 7                     | 1                                 |
| ENSG00000111203 | <i>ITFG2</i>    | 0.024131     | 7                     | 1                                 |
| ENSG00000110077 | <i>MS4A6A</i>   | 4.09E-11     | 6                     | 2                                 |
| ENSG00000104953 | <i>TLE6</i>     | 0.00146      | 6                     | 1                                 |
| ENSG00000114857 | <i>NKTR</i>     | 0.001498     | 6                     | 1                                 |
| ENSG00000235220 | <i>HLA-F</i>    | 0.00554      | 6                     | 1                                 |
| ENSG00000100600 | <i>LGMN</i>     | 3.88E-05     | 6                     | 1                                 |
| ENSG00000141076 | <i>UTP4</i>     | 0.000273     | 6                     | 1                                 |
| ENSG00000128274 | <i>A4GALT</i>   | 0.017088     | 6                     | 1                                 |
| ENSG00000166526 | <i>ZNF3</i>     | 0.031697     | 6                     | 1                                 |
| ENSG00000267060 | <i>PTGES3L</i>  | 0.000787     | 6                     | 1                                 |
| ENSG00000140153 | <i>WDR20</i>    | 0.000649     | 6                     | 1                                 |
| ENSG00000164597 | <i>COG5</i>     | 0.017088     | 5                     | 1                                 |
| ENSG00000136826 | <i>KLF4</i>     | 4.04E-05     | 5                     | 1                                 |
| ENSG00000149781 | <i>FERMT3</i>   | 0.000455     | 5                     | 1                                 |
| ENSG00000215126 | <i>ZNGIF</i>    | 2.03E-05     | 5                     | 1                                 |
| ENSG00000183484 | <i>GPRI32</i>   | 0.007169     | 5                     | 1                                 |
| ENSG00000234651 | <i>BAG6</i>     | 0.043997     | 5                     | 1                                 |
| ENSG00000130649 | <i>CYP2E1</i>   | 0.003332     | 5                     | 1                                 |
| ENSG00000114062 | <i>UBE3A</i>    | 0.000665     | 5                     | 1                                 |
| ENSG00000160218 | <i>TRAPPC10</i> | 2.99E-05     | 5                     | 1                                 |
| ENSG00000087303 | <i>NID2</i>     | 0.049472     | 5                     | 1                                 |
| ENSG00000132141 | <i>CCT6B</i>    | 0.033065     | 5                     | 1                                 |
| ENSG00000104870 | <i>FCGRT</i>    | 0.004871     | 5                     | 1                                 |
| ENSG00000111452 | <i>ADGRD1</i>   | 0.000799     | 5                     | 1                                 |
| ENSG00000104129 | <i>DNAJC17</i>  | 8.03E-05     | 5                     | 2                                 |
| ENSG00000161526 | <i>SAP30BP</i>  | 0.01653      | 5                     | 1                                 |
| ENSG00000150687 | <i>PRSS23</i>   | 0.001452     | 5                     | 1                                 |
| ENSG00000168824 | <i>NSG1</i>     | 1.50E-10     | 5                     | 1                                 |
| ENSG00000138442 | <i>WDR12</i>    | 0.000891     | 5                     | 1                                 |
| ENSG00000185988 | <i>PLK5</i>     | 0.028369     | 5                     | 1                                 |

|                 |                 |          |   |   |
|-----------------|-----------------|----------|---|---|
| ENSG00000060138 | <i>YBX3</i>     | 0.025774 | 5 | 1 |
| ENSG00000009830 | <i>POMT2</i>    | 0.00024  | 5 | 1 |
| ENSG00000078487 | <i>ZCWPW1</i>   | 0.029922 | 5 | 1 |
| ENSG00000108231 | <i>LGII</i>     | 0.01283  | 5 | 1 |
| ENSG00000115556 | <i>PLCD4</i>    | 0.004436 | 5 | 1 |
| ENSG00000129646 | <i>QRICH2</i>   | 0.024131 | 5 | 1 |
| ENSG00000088876 | <i>ZNF343</i>   | 0.019295 | 5 | 1 |
| ENSG00000106070 | <i>GRB10</i>    | 0.034105 | 5 | 1 |
| ENSG00000079459 | <i>FDFT1</i>    | 0.007753 | 5 | 1 |
| ENSG00000167699 | <i>GLOD4</i>    | 0.008841 | 5 | 1 |
| ENSG00000122687 | <i>MRM2</i>     | 0.031947 | 5 | 1 |
| ENSG00000143373 | <i>ZNF687</i>   | 0.042807 | 5 | 1 |
| ENSG00000133067 | <i>LGR6</i>     | 0.010462 | 4 | 1 |
| ENSG00000173085 | <i>COQ2</i>     | 5.20E-05 | 4 | 1 |
| ENSG00000153551 | <i>CMTM7</i>    | 0.000511 | 4 | 1 |
| ENSG00000196684 | <i>HSH2D</i>    | 0.004314 | 4 | 1 |
| ENSG00000100526 | <i>CDKN3</i>    | 0.003846 | 4 | 1 |
| ENSG00000206376 | <i>EHMT2</i>    | 0.001657 | 4 | 2 |
| ENSG00000106123 | <i>EPHB6</i>    | 4.71E-05 | 4 | 1 |
| ENSG00000276887 | <i>TTYH1</i>    | 0.039631 | 4 | 2 |
| ENSG00000109171 | <i>SLAIN2</i>   | 2.21E-05 | 4 | 1 |
| ENSG00000157303 | <i>SUSD3</i>    | 0.029384 | 4 | 1 |
| ENSG00000182378 | <i>PLCXDI</i>   | 0.012999 | 4 | 1 |
| ENSG00000023228 | <i>NDUFS1</i>   | 0.00219  | 4 | 1 |
| ENSG00000150459 | <i>SAP18</i>    | 0.008408 | 4 | 1 |
| ENSG00000151789 | <i>ZNF385D</i>  | 0.018551 | 4 | 1 |
| ENSG00000187243 | <i>MAGED4B</i>  | 0.02358  | 4 | 1 |
| ENSG00000101146 | <i>RAE1</i>     | 0.039398 | 4 | 1 |
| ENSG00000177000 | <i>MTHFR</i>    | 0.028369 | 4 | 1 |
| ENSG00000131778 | <i>CHDIL</i>    | 0.03092  | 4 | 1 |
| ENSG00000156097 | <i>GPR61</i>    | 0.007957 | 4 | 1 |
| ENSG00000172551 | <i>MUCL1</i>    | 0.038699 | 4 | 1 |
| ENSG00000112280 | <i>COL9A1</i>   | 0.000344 | 4 | 1 |
| ENSG00000156531 | <i>PHF6</i>     | 0.013047 | 4 | 1 |
| ENSG00000147364 | <i>FBXO25</i>   | 0.024465 | 4 | 1 |
| ENSG00000136560 | <i>TANK</i>     | 0.025721 | 4 | 1 |
| ENSG00000148339 | <i>SLC25A25</i> | 0.001416 | 4 | 1 |
| ENSG00000262860 | <i>LSMI4A</i>   | 0.000283 | 4 | 1 |
| ENSG00000143106 | <i>PSMA5</i>    | 0.011914 | 4 | 1 |
| ENSG00000128253 | <i>RFPL2</i>    | 0.047869 | 4 | 1 |
| ENSG00000106853 | <i>PTGRI</i>    | 0.001342 | 4 | 1 |
| ENSG00000157837 | <i>SPPL3</i>    | 0.005656 | 4 | 1 |
| ENSG00000170035 | <i>UBE2E3</i>   | 0.026186 | 4 | 1 |

|                 |                 |          |   |   |
|-----------------|-----------------|----------|---|---|
| ENSG00000072518 | <i>MARK2</i>    | 0.017807 | 4 | 1 |
| ENSG00000144744 | <i>UBA3</i>     | 0.026984 | 4 | 1 |
| ENSG00000185104 | <i>FAF1</i>     | 0.013047 | 4 | 1 |
| ENSG00000232045 | <i>EHMT2</i>    | 0.000455 | 3 | 3 |
| ENSG00000124256 | <i>ZBP1</i>     | 0.004675 | 3 | 1 |
| ENSG00000164744 | <i>SUN3</i>     | 0.027889 | 3 | 1 |
| ENSG00000228299 | <i>HLA-C</i>    | 0.000795 | 3 | 1 |
| ENSG00000273622 | <i>CDC42EP5</i> | 0.007582 | 3 | 2 |
| ENSG00000281385 | <i>AP2A2</i>    | 0.008295 | 3 | 1 |
| ENSG00000276725 | <i>CEP170</i>   | 0.012527 | 3 | 1 |
| ENSG00000240230 | <i>COX19</i>    | 5.01E-10 | 3 | 2 |
| ENSG00000150054 | <i>MPP7</i>     | 0.000107 | 3 | 2 |
| ENSG00000125850 | <i>OVOL2</i>    | 0.000625 | 3 | 1 |
| ENSG00000145220 | <i>LYAR</i>     | 3.50E-07 | 3 | 2 |
| ENSG00000134940 | <i>ACRV1</i>    | 0.003478 | 3 | 1 |
| ENSG00000181856 | <i>SLC2A4</i>   | 0.014434 | 3 | 1 |
| ENSG00000236014 | <i>VPS52</i>    | 0.003712 | 3 | 2 |
| ENSG00000231129 | <i>ABCF1</i>    | 0.007183 | 3 | 2 |
| ENSG00000132792 | <i>CTNBL1</i>   | 0.001312 | 3 | 1 |
| ENSG00000151131 | <i>NOPCHAP1</i> | 0.000283 | 3 | 1 |
| ENSG00000278229 | <i>RPS17</i>    | 0.033215 | 3 | 2 |
| ENSG00000130699 | <i>TAF4</i>     | 0.047869 | 3 | 1 |
| ENSG00000186174 | <i>BCL9L</i>    | 0.001099 | 3 | 1 |
| ENSG00000102144 | <i>PGK1</i>     | 0.000787 | 3 | 1 |
| ENSG00000274081 | <i>PUF60</i>    | 0.000595 | 3 | 1 |
| ENSG00000103707 | <i>MTFMT</i>    | 9.54E-06 | 3 | 1 |
| ENSG00000181450 | <i>ZNF678</i>   | 0.047908 | 3 | 1 |
| ENSG00000165731 | <i>RET</i>      | 0.029181 | 3 | 1 |
| ENSG00000277273 | <i>CDK7</i>     | 0.030087 | 3 | 1 |
| ENSG00000167680 | <i>SEMA6B</i>   | 0.03039  | 3 | 1 |
| ENSG00000198168 | <i>SVIP</i>     | 0.02941  | 3 | 1 |
| ENSG00000120158 | <i>RCL1</i>     | 0.037738 | 3 | 1 |
| ENSG00000065665 | <i>SEC61A2</i>  | 0.007487 | 3 | 1 |
| ENSG00000278318 | <i>ZNF229</i>   | 0.024131 | 3 | 1 |
| ENSG00000115561 | <i>CHMP3</i>    | 0.04319  | 3 | 1 |
| ENSG00000170043 | <i>TRAPPC1</i>  | 0.000283 | 3 | 1 |
| ENSG00000169181 | <i>GSG1L</i>    | 0.035077 | 3 | 1 |
| ENSG00000137996 | <i>RTCA</i>     | 0.031947 | 3 | 2 |
| ENSG00000168495 | <i>POLR3D</i>   | 0.000787 | 3 | 1 |
| ENSG00000129083 | <i>COPB1</i>    | 0.006458 | 3 | 1 |
| ENSG00000173409 | <i>ARV1</i>     | 0.000795 | 3 | 1 |
| ENSG00000162735 | <i>PEX19</i>    | 0.028196 | 3 | 1 |
| ENSG00000239961 | <i>LILRA4</i>   | 0.013484 | 2 | 2 |

|                 |                 |          |   |   |
|-----------------|-----------------|----------|---|---|
| ENSG00000213931 | <i>HBE1</i>     | 0.00037  | 2 | 2 |
| ENSG00000230475 | <i>ABHD16A</i>  | 0.004137 | 2 | 2 |
| ENSG00000237071 | <i>TRIM27</i>   | 0.01394  | 2 | 2 |
| ENSG00000228570 | <i>NUTM2E</i>   | 0.038699 | 2 | 2 |
| ENSG00000212866 | <i>HSPA1B</i>   | 0.00554  | 2 | 2 |
| ENSG00000162843 | <i>WDR64</i>    | 0.038869 | 2 | 2 |
| ENSG00000226882 | <i>GNL1</i>     | 0.007774 | 2 | 2 |
| ENSG00000196993 | <i>NPIP9</i>    | 0.008408 | 2 | 2 |
| ENSG00000230596 | <i>GPAAIP2</i>  | 0.012904 | 2 | 2 |
| ENSG00000223532 | <i>HLA-B</i>    | 0.028369 | 2 | 2 |
| ENSG00000213648 | <i>SULT1A4</i>  | 0.025579 | 2 | 2 |
| ENSG00000290457 | NA              | 0.017969 | 2 | 2 |
| ENSG00000214274 | <i>ANG</i>      | 0.028938 | 2 | 2 |
| ENSG00000129757 | <i>CDKN1C</i>   | 0.047367 | 2 | 2 |
| ENSG00000278728 | <i>CNTNAP2</i>  | 3.78E-07 | 2 | 2 |
| ENSG00000149089 | <i>APIP</i>     | 0.007228 | 2 | 2 |
| ENSG00000214026 | <i>MRPL23</i>   | 0.008408 | 2 | 2 |
| ENSG00000170915 | <i>PAQR8</i>    | 0.012809 | 2 | 2 |
| ENSG00000274332 | <i>LRRC37A2</i> | 0.023126 | 2 | 2 |
| ENSG00000169635 | <i>HIC2</i>     | 0.018651 | 2 | 2 |
| ENSG00000273673 | NA              | 0.028369 | 2 | 2 |
| ENSG00000078237 | <i>TIGAR</i>    | 0.013047 | 2 | 2 |
| ENSG00000170893 | <i>TRH</i>      | 0.038802 | 2 | 2 |
| ENSG00000188916 | <i>INSYN2A</i>  | 0.038747 | 2 | 2 |
| ENSG00000224740 | <i>FLOT1</i>    | 0.038699 | 2 | 2 |
| ENSG00000128285 | <i>MCHR1</i>    | 0.000103 | 2 | 2 |
| ENSG00000076003 | <i>MCM6</i>     | 0.003846 | 2 | 2 |
| ENSG00000276802 | <i>HERC2</i>    | 0.002292 | 2 | 2 |
| ENSG00000155962 | <i>CLIC2</i>    | 0.028369 | 2 | 2 |
| ENSG00000130720 | <i>FIBCD1</i>   | 0.033065 | 2 | 2 |
| ENSG00000213753 | <i>CENPBD2P</i> | 0.000663 | 2 | 2 |
| ENSG00000205423 | <i>CNEPIR1</i>  | 0.007487 | 2 | 2 |
| ENSG00000130703 | <i>OSBPL2</i>   | 0.023126 | 2 | 2 |
| ENSG00000139291 | <i>TMEM19</i>   | 0.042593 | 2 | 2 |
| ENSG00000112852 | <i>PCDHB2</i>   | 0.010462 | 2 | 2 |
| ENSG00000198783 | <i>ZNF830</i>   | 0.033863 | 2 | 2 |
| ENSG00000125851 | <i>PCSK2</i>    | 0.03092  | 2 | 2 |
| ENSG00000265681 | <i>RPL17</i>    | 0.001342 | 2 | 2 |
| ENSG00000160214 | <i>RRP1</i>     | 0.032229 | 2 | 2 |
| ENSG00000004059 | <i>ARF5</i>     | 0.018977 | 2 | 2 |
| ENSG00000134153 | <i>EMC7</i>     | 7.89E-05 | 2 | 2 |
| ENSG00000131016 | <i>AKAP12</i>   | 0.01056  | 2 | 2 |
| ENSG00000163655 | <i>GMPS</i>     | 0.002232 | 2 | 2 |

|                 |                |          |   |   |
|-----------------|----------------|----------|---|---|
| ENSG00000198242 | <i>RPL23A</i>  | 0.026173 | 2 | 2 |
| ENSG00000137198 | <i>GMPR</i>    | 0.02223  | 2 | 2 |
| ENSG00000169217 | <i>CD2BP2</i>  | 0.028092 | 2 | 2 |
| ENSG00000146006 | <i>LRRTM2</i>  | 0.02223  | 2 | 2 |
| ENSG00000134508 | <i>CABLES1</i> | 0.008408 | 2 | 2 |
| ENSG00000100902 | <i>PSMA6</i>   | 0.025213 | 2 | 2 |
| ENSG00000165704 | <i>HPRT1</i>   | 0.013047 | 2 | 2 |
| ENSG00000213463 | <i>SYNJ2BP</i> | 0.020489 | 2 | 2 |

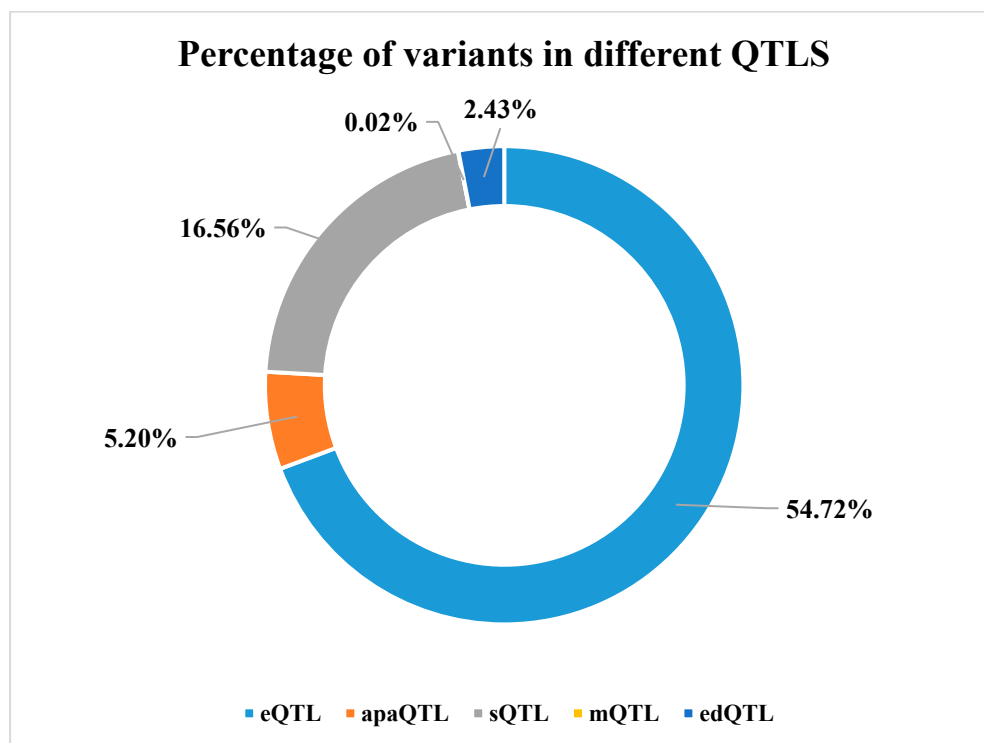

**Supplementary Figure S2:** Percentage of variants involved in different Quantitative Trait Loci

**Supplementary Table S3:** Variants that affect miRNA binding and its expression in HD.

| Chromosome | Alt/Ref | Gene          | SNP         | GWAS/novel SNP | Affected miRNA | miRNA expression | miRNA target gene/s                                                 | Expression of gene |
|------------|---------|---------------|-------------|----------------|----------------|------------------|---------------------------------------------------------------------|--------------------|
| Chr16      | G/C     | <i>SMPD3</i>  | rs12927738  | Novel          | miR-29-3p      | UP               | <i>COL4A2</i> ,<br><i>KLF4</i> ,<br><i>ITGB1</i> ,<br><i>COL1A2</i> | DOWN               |
| Chr5       | T/C     | <i>EFNA5</i>  | rs252682    | AD, PD         | miR-29-3p      | UP               | <i>COL4A2</i> ,<br><i>KLF4</i> ,<br><i>ITGB1</i> ,<br><i>COL1A2</i> | DOWN               |
| Chr1       | C/T     | <i>KLC1</i>   | rs4652791   | AMD            | miR-34a-5p     | UP               | <i>ERBB2</i> ,<br><i>SRC</i> , <i>GAS1</i> ,<br><i>PDGFR</i>        | DOWN               |
| Chr5       | G/T     | <i>SEMA6A</i> | rs258012    | Novel          | miR-124        | UP               | <i>ITGB1</i> ,<br><i>PTBP1</i> ,<br><i>MTDH</i> ,<br><i>GNAI3</i>   | DOWN               |
| Chr7       | G/T     | <i>HDAC9</i>  | rs2520362   | PD,AMD         | miR-196a-5p    | UP               | <i>RANBP9</i> ,<br><i>NOTCH2</i> ,<br><i>SRRT</i> ,<br><i>TRAP1</i> | DOWN               |
| Chr2       | C/T     | <i>IGFBP5</i> | rs11575134  | PD,AMD         | miR-146a-5p    | DOWN             | <i>SOX2</i> ,<br><i>ERBB4</i> ,<br><i>BCLAF1</i> ,<br><i>RAC1</i>   | UP                 |
| Chr6       | T/G     | <i>BCLAF1</i> | rs180998508 | Novel          | miR-146a-5p    | DOWN             | <i>SOX2</i> ,<br><i>ERBB4</i> ,<br><i>BCLAF1</i> ,<br><i>RAC1</i>   | UP                 |



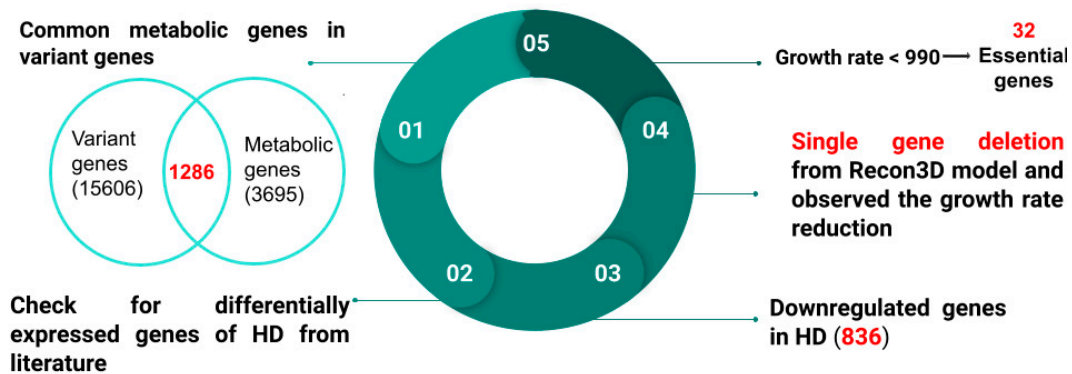

**Supplementary Figure S3:** Identification of essential genes through single gene deletion analysis

**Supplementary Table S4:** Importance of essential genes and the their metabolic flux

| GENE            | Number of reactions deleted through gene deletion | Metabolic flux | Importance of the gene                                                                                       |
|-----------------|---------------------------------------------------|----------------|--------------------------------------------------------------------------------------------------------------|
| <i>SLC25A10</i> | 20                                                | 789.3583       | Knockdown of this gene causes defects in mitochondrial respiration[108]                                      |
| <i>CMPK1</i>    | 40                                                | 826.2042       | Eliminating this gene will inhibit proliferation and increase apoptosis [109]                                |
| <i>RRM1</i>     | 6                                                 | 879.9701       | Knockout of this gene will trigger apoptosis and inhibit growth significantly [110]                          |
| <i>GBE1</i>     | 1                                                 | 880.7468       | Knockdown of <i>GBE1</i> makes it more susceptible in neuron degeneration [111]                              |
| <i>PYGL</i>     | 1                                                 | 904.0637       | Removal of this gene from the system effects the metabolic pathways and cause glycogen storage disease [112] |

|               |    |          |                                                                                                                                                                       |
|---------------|----|----------|-----------------------------------------------------------------------------------------------------------------------------------------------------------------------|
| <i>ACSL1</i>  | 21 | 916.7597 | Knockout of this gene causes major metabolic defects like mitochondria based long chain FA degradation [113]                                                          |
| <i>GPI</i>    | 3  | 919.3579 | Removal of GPI gene induces cell proliferation inhibition [114]                                                                                                       |
| <i>DERA</i>   | 1  | 925.6295 | Knockdown of this gene causes stress within mitochondria which starts a cascade of events for energy crisis in brain [115]                                            |
| <i>TALDO1</i> | 1  | 932.2939 | <i>TALDO1</i> is a crucial gene involving in metabolic pathways and its removal can cause major impact on the metabolic system [116]                                  |
| <i>MCCC2</i>  | 1  | 943.0063 | Knockout study on <i>MCCC2</i> showed that it induces cell proliferation [117]                                                                                        |
| <i>PGLS</i>   | 2  | 945.7904 | <i>PGLS</i> is crucial and a knockdown study in glioblastoma is performed on PGLS and it is found that NADPH and GSH neurotransmitter are reduced [118]               |
| <i>DMAC2L</i> | 1  | 947.3364 | Removal of <i>DMAC2L</i> results in reduced carbohydrate metabolism and in turn restricts motility/ movement. [119]                                                   |
| <i>GUK1</i>   | 3  | 951.0216 | <i>GUK1</i> is a major participant of GTP and dGTP metabolism and its removal can impact majorly on metabolic pathways that aid in energy supply for brain [120][121] |
| <i>PGD</i>    | 3  | 951.9599 | Knockout of this gene will cause increased cell stress and expansion of endoplasmic reticulum volume leading to energy catastrophe [122]                              |
| <i>PFKL</i>   | 5  | 956.2257 | <i>PFKL</i> gene inhibits glycolysis , a crucial mechanism in energy pumping when it is knocked down.[123]                                                            |
| <i>DBI</i>    | 21 | 958.2383 | <i>DBI</i> is mostly found to be expressed in astrocytes and its removal will cause                                                                                   |

|                |    |          |                                                                                                                                                                   |
|----------------|----|----------|-------------------------------------------------------------------------------------------------------------------------------------------------------------------|
|                |    |          | alterations in GABA signalling that is crucial in brain [124]                                                                                                     |
| <i>HMGCR</i>   | 4  | 959.3648 | Removal of <i>HMGCR</i> will cause ER stress in the cell which is a sign for energy insufficiency[125]                                                            |
| <i>BCAT2</i>   | 3  | 963.2047 | <i>BCAT2</i> gene removal will effect mitochondrial respiration, oxygen consumption rate of cells [126]                                                           |
| <i>CPT2</i>    | 46 | 964.122  | Knockout study on <i>BCAT2</i> effects the beta oxidation [127]                                                                                                   |
| <i>SDHB</i>    | 2  | 965.545  | <i>CPT2</i> is a crucial metabolic gene and reduced complex 2 activity is observed when removed in zebrafish [128]                                                |
| <i>CTH</i>     | 2  | 970.6769 | <i>CTH</i> is top gene producing H <sub>2</sub> S in blood vessels and its knockdown results in brain vasculature development [129]                               |
| <i>CPT1A</i>   | 12 | 970.9974 | Knockdown of <i>CPT1A</i> caused metabolic disturbances in the cell [130]                                                                                         |
| <i>NADSYN1</i> | 3  | 976.0198 | <i>NADSYN1</i> is an essential gene due to its role in neovascularization and its impairment can cause major loss of function in blood vessel morphogenesis [131] |
| <i>COX8A</i>   | 2  | 976.4597 | Loss of <i>COX8A</i> gene will result in epilepsy and leigh like syndrome – movement related disorders [132]                                                      |
| <i>COX7A2</i>  | 2  | 976.4597 | Knock down of <i>COX7A2</i> will lead to locomotor defect [133]                                                                                                   |
| <i>COX4II</i>  | 2  | 976.4597 | <i>COX4II</i> is a crucial gene and reduced neuronal network activity is observed [134]                                                                           |
| <i>COX7B</i>   | 2  | 976.4597 | Altered CNS activity is observed when <i>COX7B</i> is knocked out [135]                                                                                           |

|                |   |          |                                                                                                                                                                 |
|----------------|---|----------|-----------------------------------------------------------------------------------------------------------------------------------------------------------------|
| <i>COX6C</i>   | 2 | 976.4597 | Removal of <i>COX6C</i> will lead to developmental death in cells which makes it crucial [136]                                                                  |
| <i>COX5A</i>   | 2 | 976.4597 | Knock down of this gene induces STRESS and lead to autophagy [137]                                                                                              |
| <i>SLC37A4</i> | 3 | 981.487  | <i>SLC37A4</i> is a key activator of autophagy so, its absence will create major impact on metabolic pathways of brain [138]                                    |
| <i>DPYD</i>    | 2 | 982.7158 | <i>DPYD</i> produces inhibitory neurotransmitters which are crucial for functioning of neuronal population and knockdown will have a great impact on them [139] |
| <i>PTDSSI</i>  | 1 | 986.7217 | Removal of gene <i>PTDSSI</i> may lead to reduced neuron growth/ axon extension [140]                                                                           |

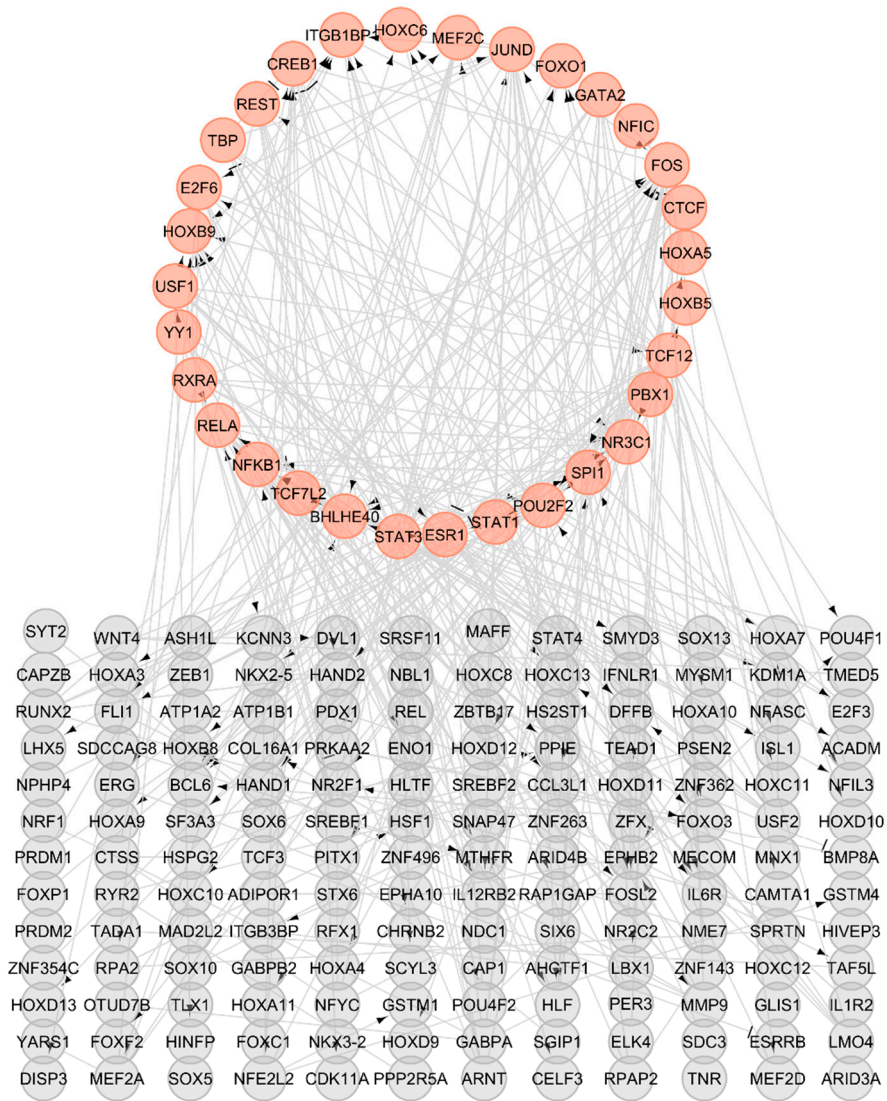

**Supplementary Figure S4:** Function interaction network of variant genes, differentially expressed genes and transcription factors. Orange color nodes represent hub genes based on network properties like degree, betweenness centrality. Grey nodes represent non-hub genes of FI network.

**Supplementary Table S5:** Gene interactions between DEGs, variant genes and transcription factors of hub genes

| GENE1        | FI Direction | GENE2         | FI Score | FI Annotation                                 |
|--------------|--------------|---------------|----------|-----------------------------------------------|
| <i>HOXA5</i> | ←            | <i>TCF12</i>  | 1        | expression regulated by                       |
| <i>NR3C1</i> | ←            | <i>SPI1</i>   | 1        | expression regulated by; reaction             |
| <i>NR3C1</i> | ←            | <i>PBX1</i>   | 1        | activated by; inhibit                         |
| <i>NR3C1</i> | ←            | <i>RXRA</i>   | 1        | activated by                                  |
| <i>NR3C1</i> | ←            | <i>RELA</i>   | 1        | activate; activated by; complex; inhibit      |
| <i>NR3C1</i> | ←            | <i>TBP</i>    | 1        | activated by; inhibit                         |
| <i>NR3C1</i> | ←            | <i>RUNX2</i>  | 1        | activated by; inhibit                         |
| <i>HOXC6</i> | ←            | <i>SPI1</i>   | 1        | expression regulated by                       |
| <i>HOXC6</i> | ←            | <i>ZEB1</i>   | 1        | expression regulated by                       |
| <i>HOXC6</i> | ←            | <i>TCF12</i>  | 1        | expression regulated by                       |
| <i>ESR1</i>  | -            | <i>LMO4</i>   | 1        | complex                                       |
| <i>ESR1</i>  | -            | <i>POU4F2</i> | 1        | complex; inhibit                              |
| <i>ESR1</i>  | -            | <i>USF2</i>   | 1        | complex                                       |
| <i>ESR1</i>  | -            | <i>KDM1A</i>  | 1        | complex                                       |
| <i>ESR1</i>  | →            | <i>POU4F1</i> | 1        | activate; complex                             |
| <i>ESR1</i>  | →            | <i>HOXA10</i> | 1        | expression regulates                          |
| <i>ESR1</i>  | →            | <i>NR3C1</i>  | 1        | activate; inhibited by                        |
| <i>ESR1</i>  | →            | <i>OTUD7B</i> | 1        | expression regulates                          |
| <i>ESR1</i>  | →            | <i>NFIC</i>   | 1        | activate; inhibited by                        |
| <i>ESR1</i>  | -            | <i>TBP</i>    | 1        | complex                                       |
| <i>ESR1</i>  | ←            | <i>USF1</i>   | 1        | complex; expression regulated by              |
| <i>ESR1</i>  | →            | <i>JUND</i>   | 1        | complex; expression regulates; reaction       |
| <i>JUND</i>  | →            | <i>TEAD1</i>  | 1        | expression regulates                          |
| <i>JUND</i>  | →            | <i>NR2F1</i>  | 1        | expression regulates                          |
| <i>JUND</i>  | →            | <i>SPI1</i>   | 1        | expression regulates                          |
| <i>JUND</i>  | →            | <i>POU2F2</i> | 1        | expression regulates                          |
| <i>JUND</i>  | →            | <i>PRDM1</i>  | 1        | expression regulates                          |
| <i>JUND</i>  | ←            | <i>TCF12</i>  | 1        | expression regulated by; expression regulates |
| <i>JUND</i>  | →            | <i>MEF2C</i>  | 1        | expression regulates                          |
| <i>JUND</i>  | ←            | <i>TBP</i>    | 1        | expression regulated by                       |
| <i>JUND</i>  | →            | <i>STAT3</i>  | 1        | expression regulates                          |
| <i>JUND</i>  | →            | <i>STAT1</i>  | 1        | expression regulates                          |
| <i>JUND</i>  | ←            | <i>SREBF1</i> | 1        | expression regulated by                       |
| <i>JUND</i>  | →            | <i>SREBF2</i> | 1        | expression regulates                          |
| <i>GATA2</i> | →            | <i>SPI1</i>   | 1        | complex; expression regulates                 |
| <i>GATA2</i> | →            | <i>ZEB1</i>   | 1        | expression regulates                          |
| <i>GATA2</i> | -            | <i>TCF3</i>   | 1        | complex                                       |
| <i>GATA2</i> | →            | <i>HLF</i>    | 1        | expression regulates                          |
| <i>GATA2</i> | →            | <i>NR3C1</i>  | 1        | expression regulates                          |

|              |   |                 |   |                                                 |
|--------------|---|-----------------|---|-------------------------------------------------|
| <i>GATA2</i> | → | <i>TCF12</i>    | 1 | complex; expression regulates                   |
| <i>CREB1</i> | - | <i>TCF12</i>    | 1 | complex                                         |
| <i>CREB1</i> | → | <i>NR3C1</i>    | 1 | activate; expression regulates;<br>inhibited by |
| <i>CREB1</i> | → | <i>ZBTB17</i>   | 1 | activate; inhibited by                          |
| <i>CREB1</i> | → | <i>KCNN3</i>    | 1 | expression regulates                            |
| <i>CREB1</i> | → | <i>REST</i>     | 1 | activate; inhibited by                          |
| <i>CREB1</i> | → | <i>TBP</i>      | 1 | expression regulates; reaction                  |
| <i>CREB1</i> | - | <i>NFE2L2</i>   | 1 | complex                                         |
| <i>CREB1</i> | → | <i>STAT3</i>    | 1 | expression regulates; reaction                  |
| <i>CREB1</i> | - | <i>MEF2D</i>    | 1 | complex; reaction                               |
| <i>CREB1</i> | ← | <i>NFKB1</i>    | 1 | expression regulated by; reaction               |
| <i>TCF12</i> | ← | <i>USF1</i>     | 1 | expression regulated by                         |
| <i>SPI1</i>  | ← | <i>ZNF263</i>   | 1 | expression regulated by                         |
| <i>SPI1</i>  | ← | <i>STAT3</i>    | 1 | expression regulated by                         |
| <i>SPI1</i>  | → | <i>ZEB1</i>     | 1 | expression regulates                            |
| <i>SPI1</i>  | - | <i>TBP</i>      | 1 | complex                                         |
| <i>SPI1</i>  | → | <i>USF1</i>     | 1 | expression regulates                            |
| <i>SPI1</i>  | ← | <i>USF2</i>     | 1 | expression regulated by                         |
| <i>TBP</i>   | - | <i>ZNF143</i>   | 1 | complex                                         |
| <i>TBP</i>   | → | <i>ZBTB17</i>   | 1 | activate; inhibited by                          |
| <i>MEF2C</i> | ← | <i>ZNF263</i>   | 1 | expression regulated by                         |
| <i>MEF2C</i> | - | <i>TCF3</i>     | 1 | complex                                         |
| <i>MEF2C</i> | ← | <i>USF1</i>     | 1 | expression regulated by                         |
| <i>MEF2C</i> | - | <i>NKX2-5</i>   | 1 | complex; reaction                               |
| <i>RELA</i>  | ← | <i>SREBF1</i>   | 1 | activated by; inhibited                         |
| <i>RELA</i>  | ← | <i>SREBF2</i>   | 1 | activated by; inhibit                           |
| <i>RELA</i>  | ← | <i>STAT4</i>    | 1 | activated by                                    |
| <i>RELA</i>  | ← | <i>RXRA</i>     | 1 | activated by; inhibited                         |
| <i>YY1</i>   | → | <i>ZNF143</i>   | 1 | expression regulates                            |
| <i>YY1</i>   | → | <i>ZBTB17</i>   | 1 | expression regulates                            |
| <i>HOXB9</i> | ← | <i>MAFF</i>     | 1 | expression regulated by                         |
| <i>HOXB9</i> | ← | <i>USF1</i>     | 1 | expression regulated by                         |
| <i>HOXB9</i> | ← | <i>JUND</i>     | 1 | expression regulated by                         |
| <i>HOXB9</i> | ← | <i>SREBF1</i>   | 1 | expression regulated by                         |
| <i>HOXB9</i> | ← | <i>TCF7L2</i>   | 1 | expression regulated by                         |
| <i>HOXB9</i> | ← | <i>TCF12</i>    | 1 | expression regulated by                         |
| <i>HOXB9</i> | ← | <i>RXRA</i>     | 1 | expression regulated by                         |
| <i>CTCF</i>  | → | <i>NFIL3</i>    | 1 | expression regulates                            |
| <i>CTCF</i>  | - | <i>RXRA</i>     | 1 | complex                                         |
| <i>CTCF</i>  | → | <i>ITGB1BP1</i> | 1 | expression regulates                            |
| <i>CTCF</i>  | - | <i>PBX1</i>     | 1 | complex                                         |
| <i>CTCF</i>  | → | <i>TCF12</i>    | 1 | expression regulates                            |
| <i>CTCF</i>  | → | <i>SPI1</i>     | 1 | expression regulates                            |
| <i>CTCF</i>  | → | <i>FLI1</i>     | 1 | expression regulates                            |
| <i>CTCF</i>  | → | <i>STAT3</i>    | 1 | expression regulates                            |

|                 |   |               |   |                                                              |
|-----------------|---|---------------|---|--------------------------------------------------------------|
| <i>CTCF</i>     | → | <i>HOXA5</i>  | 1 | expression regulates                                         |
| <i>ITGB1BP1</i> | ← | <i>USF1</i>   | 1 | expression regulated by                                      |
| <i>ITGB1BP1</i> | ← | <i>ZNF263</i> | 1 | expression regulated by                                      |
| <i>ITGB1BP1</i> | ← | <i>MAFF</i>   | 1 | expression regulated by                                      |
| <i>ITGB1BP1</i> | ← | <i>RXRA</i>   | 1 | expression regulated by                                      |
| <i>ITGB1BP1</i> | ← | <i>SPI1</i>   | 1 | expression regulated by                                      |
| <i>ITGB1BP1</i> | ← | <i>YY1</i>    | 1 | expression regulated by                                      |
| <i>ITGB1BP1</i> | ← | <i>JUND</i>   | 1 | expression regulated by                                      |
| <i>NFKB1</i>    | → | <i>REL</i>    | 1 | complex; expression regulates                                |
| <i>NFKB1</i>    | ← | <i>SREBF2</i> | 1 | activated by; inhibit                                        |
| <i>NFKB1</i>    | ← | <i>SREBF1</i> | 1 | activated by; inhibit                                        |
| <i>NFKB1</i>    | ← | <i>SPI1</i>   | 1 | expression regulated by                                      |
| <i>NFKB1</i>    | → | <i>STAT1</i>  | 1 | expression regulates                                         |
| <i>NFKB1</i>    | ← | <i>STAT4</i>  | 1 | activated by                                                 |
| <i>NFKB1</i>    | → | <i>NR3C1</i>  | 1 | activate; complex; expression regulates; inhibited by; input |
| <i>NFKB1</i>    | → | <i>POU2F2</i> | 1 | activate; expression regulates                               |
| <i>NFIC</i>     | → | <i>NR3C1</i>  | 1 | expression regulates                                         |
| <i>BHLHE40</i>  | → | <i>HOXB9</i>  | 1 | expression regulates                                         |
| <i>BHLHE40</i>  | ← | <i>TCF7L2</i> | 1 | expression regulated by                                      |
| <i>BHLHE40</i>  | ← | <i>STAT3</i>  | 1 | expression regulated by                                      |
| <i>BHLHE40</i>  | ← | <i>NR3C1</i>  | 1 | expression regulated by                                      |
| <i>BHLHE40</i>  | ← | <i>TCF12</i>  | 1 | expression regulated by                                      |
| <i>BHLHE40</i>  | ← | <i>MEF2C</i>  | 1 | expression regulated by                                      |
| <i>BHLHE40</i>  | ← | <i>MEF2A</i>  | 1 | expression regulated by                                      |
| <i>USF1</i>     | ← | <i>YY1</i>    | 1 | expression regulated by                                      |
| <i>USF1</i>     | - | <i>USF2</i>   | 1 | complex; input                                               |
| <i>REST</i>     | ← | <i>TCF12</i>  | 1 | activated by; expression regulates; inhibit                  |
| <i>FOS</i>      | → | <i>HLF</i>    | 1 | expression regulates                                         |
| <i>FOS</i>      | - | <i>TCF7L2</i> | 1 | complex; input                                               |
| <i>FOS</i>      | - | <i>GATA2</i>  | 1 | complex; input; reaction                                     |
| <i>FOS</i>      | → | <i>NFIC</i>   | 1 | activate; inhibited by                                       |
| <i>FOS</i>      | → | <i>STAT4</i>  | 1 | activate; inhibited by; reaction                             |
| <i>FOS</i>      | → | <i>HLTF</i>   | 1 | expression regulates                                         |
| <i>FOS</i>      | → | <i>ZNF143</i> | 1 | expression regulates                                         |
| <i>FOS</i>      | → | <i>RFX1</i>   | 1 | expression regulates                                         |
| <i>FOS</i>      | → | <i>NR3C1</i>  | 1 | activate; complex; inhibited by; input; reaction             |
| <i>FOS</i>      | → | <i>FOSL2</i>  | 1 | expression regulates                                         |
| <i>FOS</i>      | ← | <i>JUND</i>   | 1 | complex; expression regulated by                             |
| <i>FOXO1</i>    | ← | <i>LMO4</i>   | 1 | activated by                                                 |
| <i>FOXO1</i>    | - | <i>NFYC</i>   | 1 | complex                                                      |
| <i>FOXO1</i>    | ← | <i>IL6R</i>   | 1 | activated by                                                 |
| <i>FOXO1</i>    | - | <i>NR3C1</i>  | 1 | complex; reaction                                            |
| <i>E2F6</i>     | → | <i>TCF12</i>  | 1 | expression regulates                                         |



|        |   |               |   |                         |
|--------|---|---------------|---|-------------------------|
| E2F6   | → | <i>HLF</i>    | 1 | expression regulates    |
| E2F6   | → | <i>ZEB1</i>   | 1 | expression regulates    |
| E2F6   | ← | <i>NR3C1</i>  | 1 | expression regulated by |
| E2F6   | ← | <i>JUND</i>   | 1 | expression regulated by |
| E2F6   | → | <i>ENO1</i>   | 1 | expression regulates    |
| E2F6   | → | <i>MEF2A</i>  | 1 | expression regulates    |
| E2F6   | → | <i>POU2F2</i> | 1 | expression regulates    |
| E2F6   | → | <i>PER3</i>   | 1 | expression regulates    |
| HOXB5  | ← | <i>TCF12</i>  | 1 | expression regulated by |
| POU4F2 | ← | <i>REST</i>   | 1 | expression regulated by |

FI: Functional Interaction

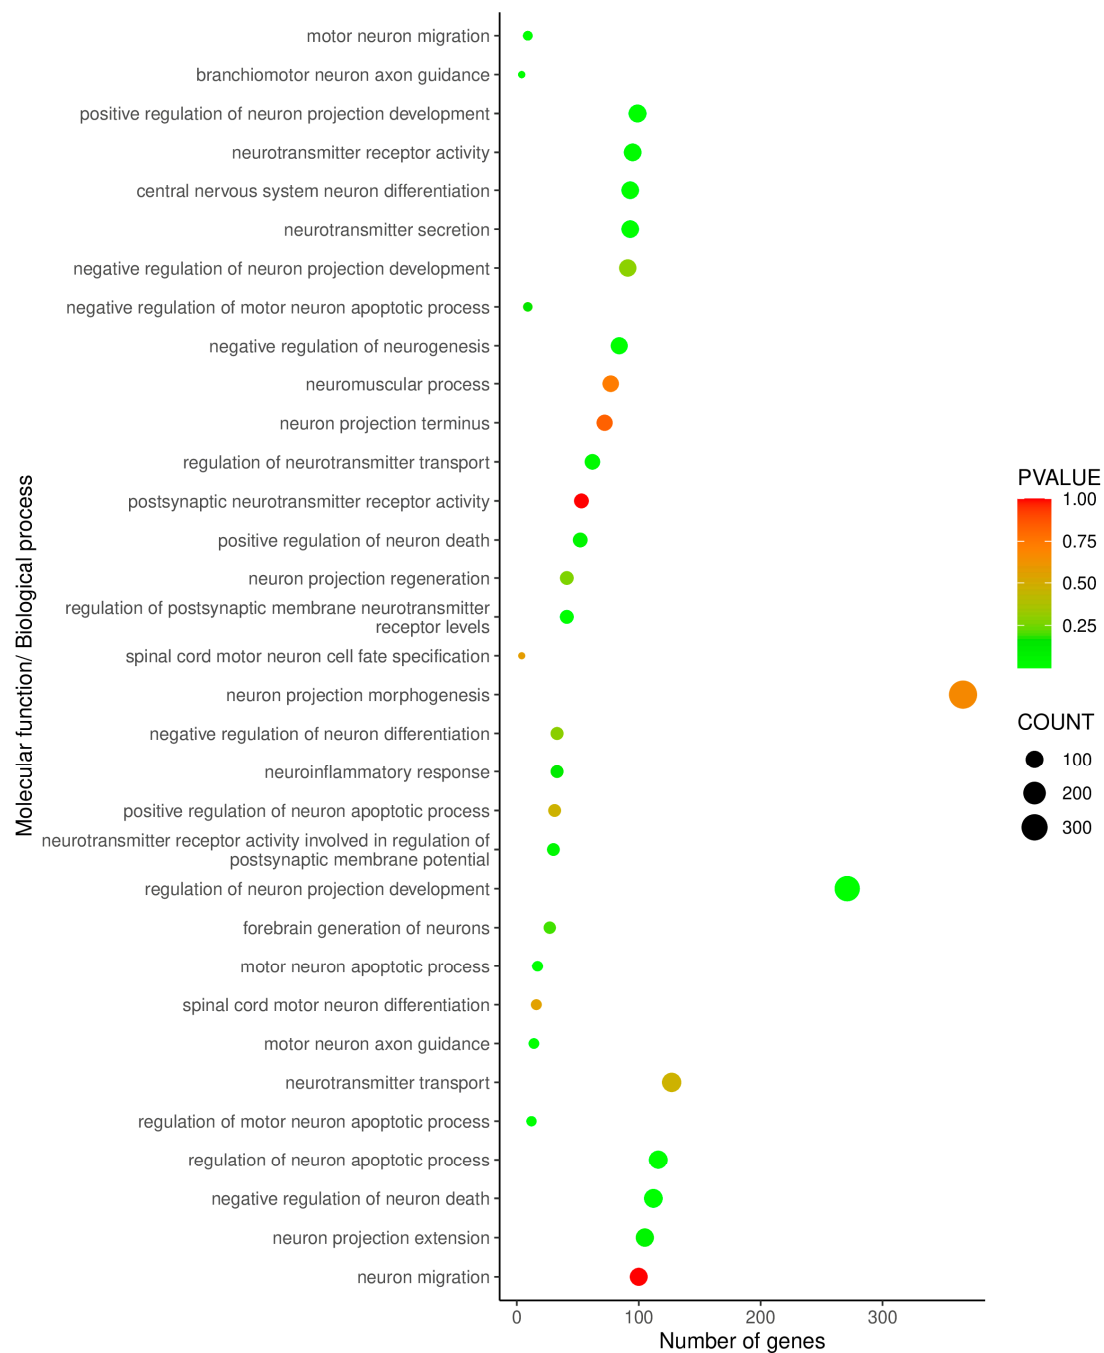

**Supplementary Figure S5: Number of differentially expressed genes and variant genes in different biological processes**
